# Supplementary material for: Fabrication and application of a ratiometric and colorimetric fluorescent probe for Hg2+ based on dual-emissive metal–organic framework hybrids with carbon dots and Eu3+
Source: Royal Society of Chemistry journal article supplement (doi:10.1039/c5tc04002g), 2016-01-01
Supplement: c5tc04002g1.pdf [file c5tc04002g1.pdf]

## **Supporting information**

### **Fabrication and application of ratiometric and colorimetric fluorescent probe for Hg<sup>2+</sup> based on dual-emissive metal-organic framework hybrids with carbon dots and Eu<sup>3+</sup>**

Xiao-Yu Xu and Bing Yan\*

Shanghai Key Lab of Chemical Assessment and Sustainability, Department of Chemistry, Tongji University, Siping Road 1239, Shanghai 200092, China.

\*E-mail: byan@tongji.edu.cn.

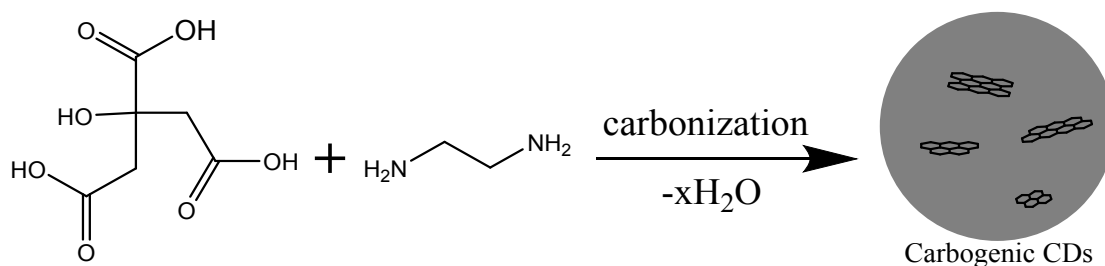

**Fig. S1** A synthetic route using citric acid and ethylenediamine to form carbogenic CDs in aqueous solution.

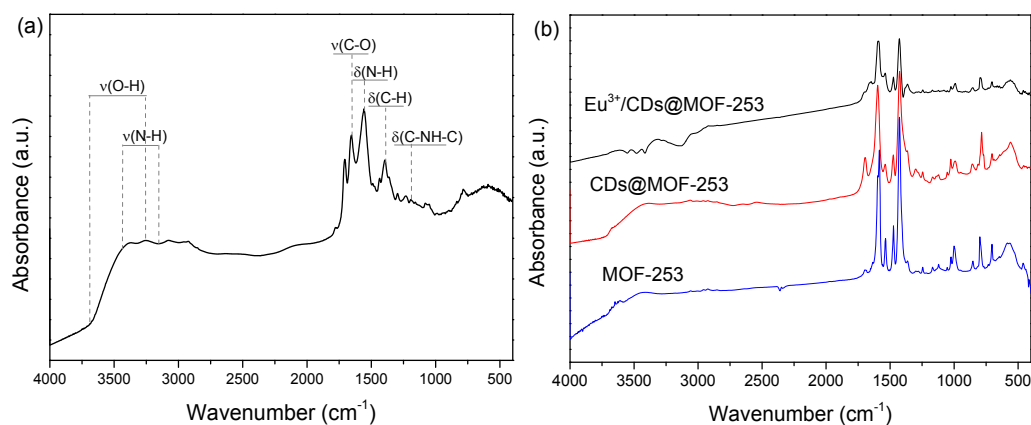

**Fig. S2** FTIR spectra of (a) CDs and (b) MOF-253, CDs@MOF-253 and  $\text{Eu}^{3+}/\text{CDs@MOF-253}$ . In the FTIR analysis of CDs, broad absorption bands at  $3000\text{--}3500\text{ cm}^{-1}$  are assigned to  $\nu_{(\text{O-H})}$  and  $\nu_{(\text{N-H})}$ . The hydrophilicity and stability of CDs in aqueous system can be improved by this functional groups. The following were observed simultaneously:  $\nu_{(\text{C-NH-C})}$  at  $1126\text{ cm}^{-1}$ ,  $\delta_{(\text{N-H})}$  at  $1570\text{ cm}^{-1}$ , and the  $\nu_{(\text{C=O})}$  at  $1635\text{ cm}^{-1}$ .<sup>S1</sup>

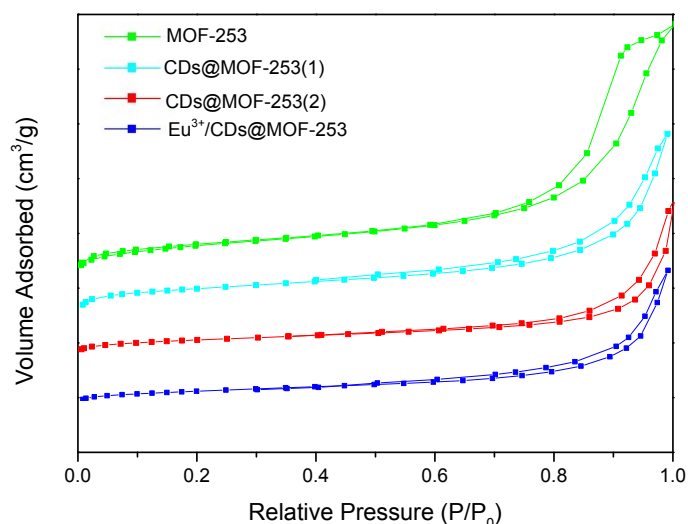

**Fig. S3**  $N_2$  adsorption and desorption isotherms of MOF-253, CDs@MOF-253 (the CDs content is 100 mg for (1) and 200 mg for (2)) and  $Eu^{3+}/CDs@MOF-253$ . The BET surface areas of MOF-253, CDs@MOF-253 (1), CDs@MOF-253 (2) and  $Eu^{3+}/CDs@MOF-253$  were calculated to be 723, 386, 215 and 207  $m^2/g$ . And the  $N_2$  sorption isotherms and BET surface area are considerably different from the previous work.<sup>S2</sup> We speculate the following points which are different from others could be responsible for this: 1) Sodium acetate has been added for size adjustment in our work; 2) Our reaction vessel (15 mL) is a bit smaller than the reported one; 3) The much higher dried temperature under dynamic vacuum on a Schlenk line cannot be achieved in our work.

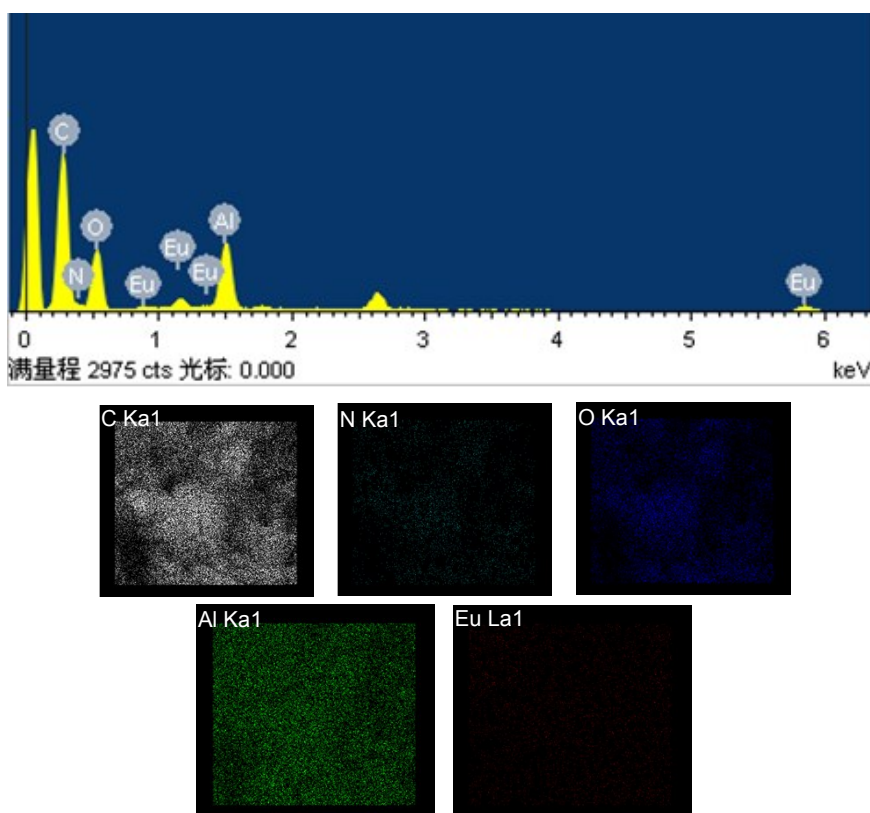

**Fig. S4** EDS pattern and SEM mapping of as-prepared  $Eu^{3+}/CDs@MOF-253$  samples.

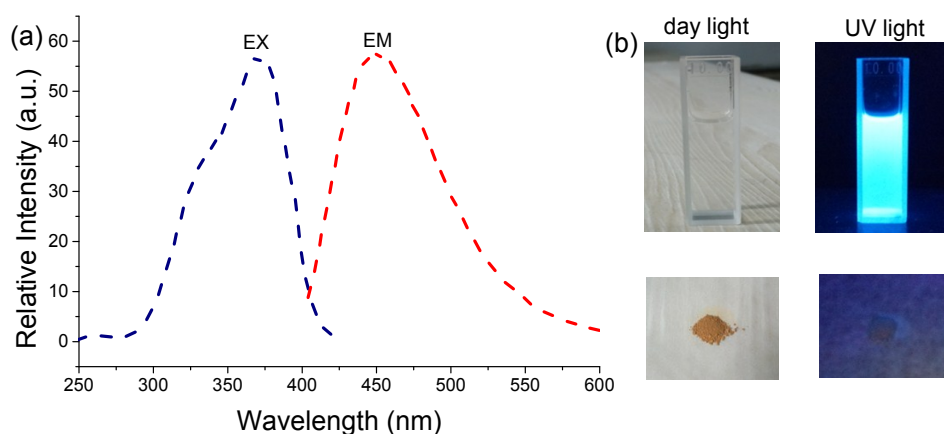

**Fig. S5** (a) Room temperature excitation (blue line) and emission spectra (red line) of CDs aqueous solution; (b) the corresponding photographs of CDs solution (top) and dried CDs (bottom) under day light and UV light irradiation at 365 nm.

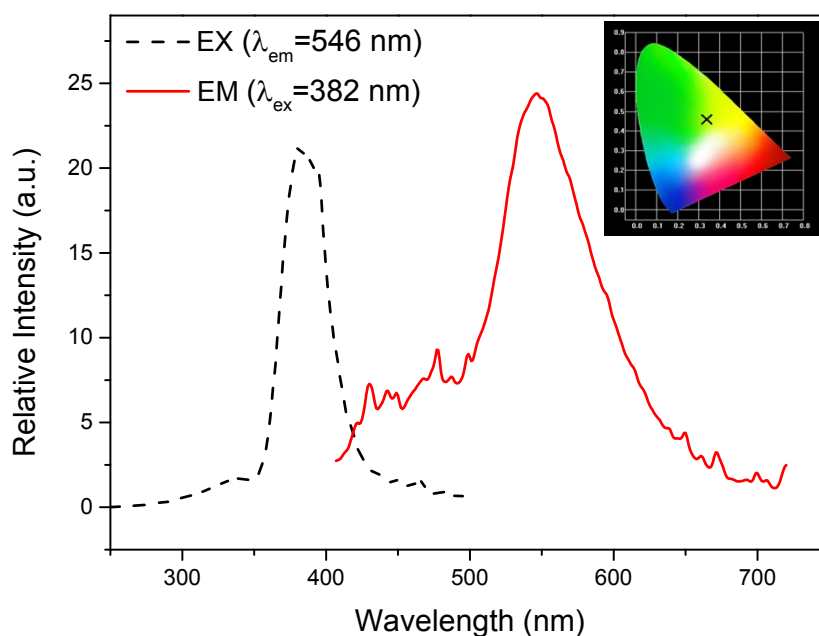

**Fig. S6** Room temperature excitation (black line) and emission spectra (red line) of MOF-253 in aqueous environment. The inset is its corresponding CIE chromaticity diagram.

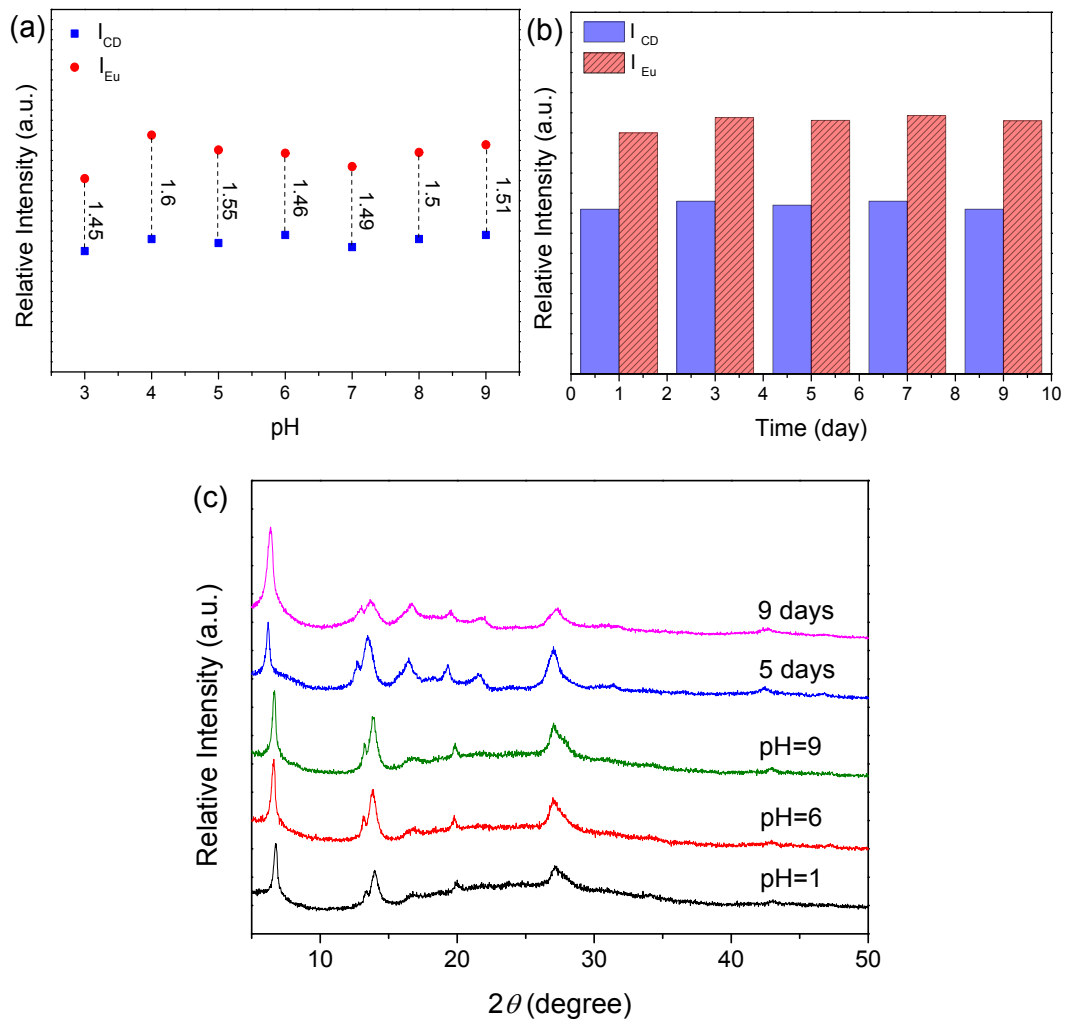

**Fig. S7** Stability of PL intensity of  $\text{Eu}^{3+}/\text{CDs}@MOF-253$  (a) after immersing in different pH aqueous solutions for 1 h and (b) after treated in aqueous solution for 9 days; (c) PXRD patterns of  $\text{Eu}^{3+}/\text{CDs}@MOF-253$  after exposure to different pH and different storage time in  $\text{H}_2\text{O}$ .

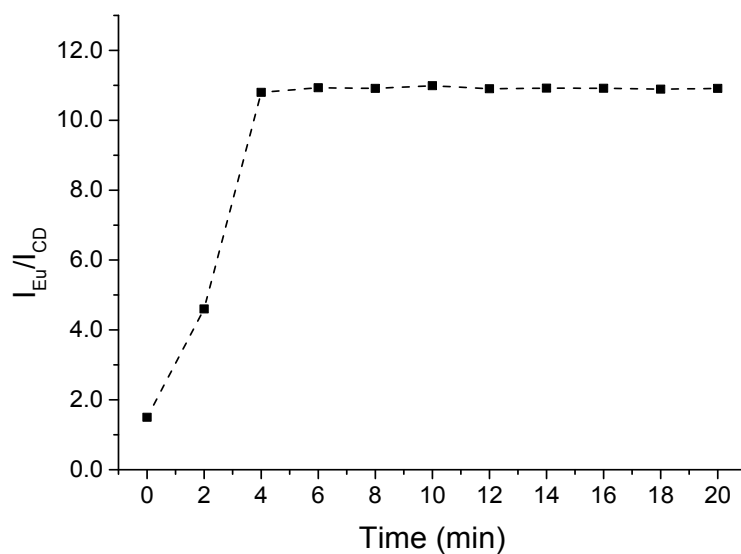

**Fig. S8** PL response of  $\text{Eu}^{3+}/\text{CDs}@MOF-253$  at  $I_{Eu}/I_{CD}$  with immersion time in the aqueous solution of  $\text{Hg}^{2+}$  (100  $\mu\text{M}$ ),  $\lambda_{ex} = 360$  nm.

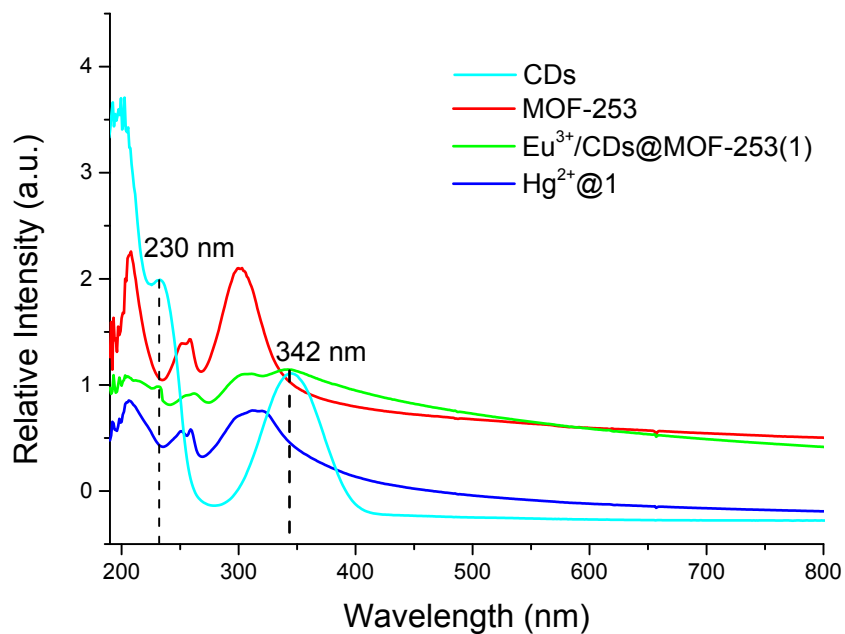

**Fig. S9** UV-vis absorption spectra of fine suspensions of powdered CDs, MOF-253,  $\text{Eu}^{3+}/\text{CDs}@MOF-253$  and  $\text{Hg}^{2+}$  treated  $\text{Eu}^{3+}/\text{CDs}@MOF-253$  in aqueous solution.

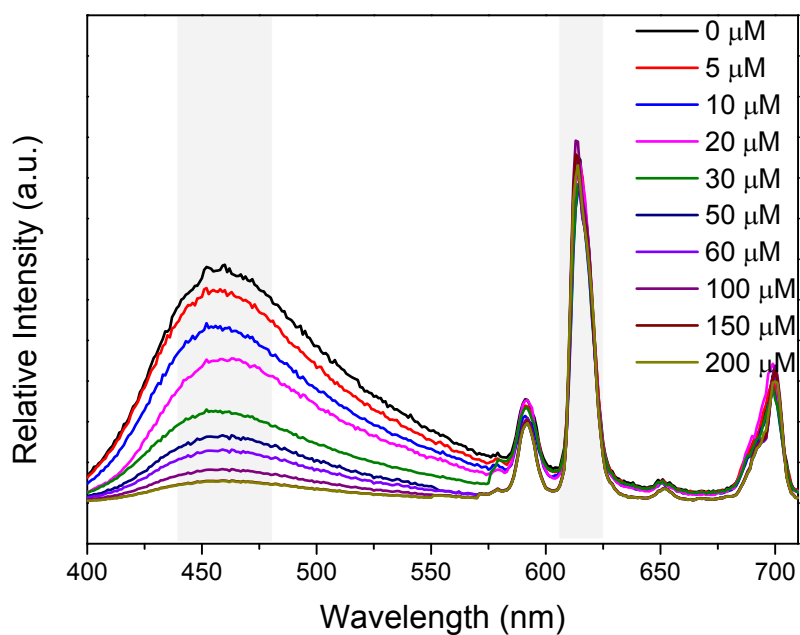

**Fig. S10** PL emission spectra of  $\text{Eu}^{3+}/\text{CDs}@MOF-253$  in the presence of different concentration (0-200  $\mu\text{M}$ ) of  $\text{Hg}^{2+}$  in aqueous solution,  $\lambda_{\text{ex}} = 360 \text{ nm}$ .

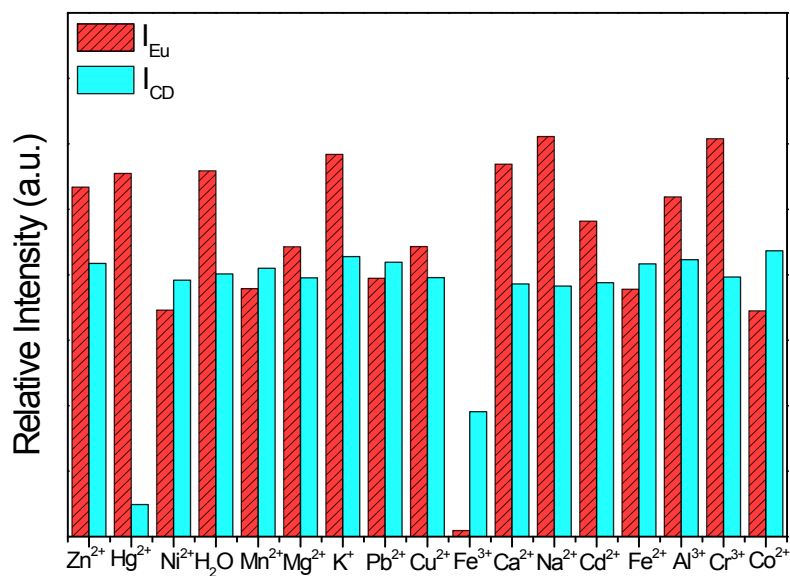

**Fig. S11** Selectivity of the  $\text{Eu}^{3+}/\text{CDs@MOF-253}$  (3 mg) based sensor for  $\text{Hg}^{2+}$  over other metal ions (100  $\mu\text{M}$ ) in aqueous solution.

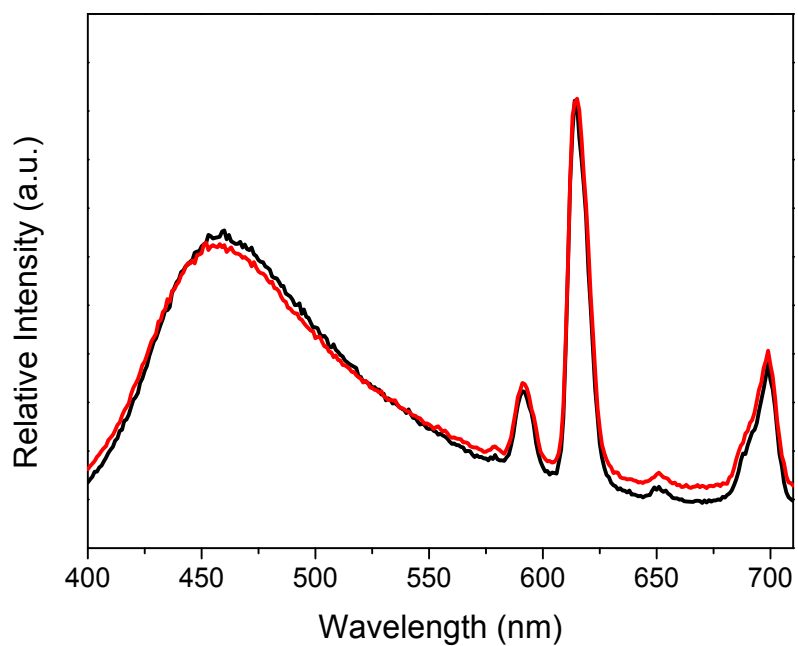

**Fig. S12** PL emission spectra of  $\text{Eu}^{3+}/\text{CDs@MOF-253}$  in aqueous solution (black line) and in supernatant fluid of  $\text{Hg}^{2+}$  removal (red line),  $\lambda_{\text{ex}} = 360 \text{ nm}$ .

**Table S1** Hg<sup>2+</sup> removal ability by Eu<sup>3+</sup>/CDs@MOF-253 in its aqueous solution.

| C <sub>Hg2+</sub> (μM) | M <sub>Eu/CDs@MOFs</sub> (mg) <sup>a</sup> | I <sub>Eu</sub> /I <sub>CD</sub> | C <sub>Hg2+</sub> (μM) | M <sub>Eu/CDs@MOFs</sub> (mg) <sup>a</sup> | I <sub>Eu</sub> /I <sub>CD</sub> |
|------------------------|--------------------------------------------|----------------------------------|------------------------|--------------------------------------------|----------------------------------|
| 5                      | 0.3±4.0%                                   | 1.48                             | 30                     | 2.0±9.5%                                   | 1.43                             |
| 10                     | 0.6±8.2%                                   | 1.45                             | 50                     | 3.5±13.4%                                  | 1.44                             |
| 20                     | 1.0±11.2%                                  | 1.52                             | 60                     | 4.0±17.3%                                  | 1.41                             |

<sup>a</sup> The result was expressed as mean of five measurements ± standard deviation (SD).

## References

- S1. a) X. Zhai, P. Zhang, C. Liu, T. Bai, W. Li, L. Dai, W. Liu, *Chem. Commun.*, 2012, **48**, 7955; b) D. Pan, J. Zhang, Z. Li, C. Wu, X. Yan, M. Wu, *Chem. Commun.*, 2010, **46**, 3681.
- S2. a) E. D. Bloch, D. Britt, C. Lee, C. J. Doonan, F. J. Uribe-Romo, H. Furukawa, J. R. Long, O. M. Yaghi, *J. Am. Chem. Soc.* 2010, **132**, 14382; b) F. Carson, S. Agrawal, M. Gustafsson, A. Bartoszewicz, F. Moraga, X. D. Zou, B. Martin-Matute, *Chem-Eur. J.* 2012, **18**, 15337.
